# Supplementary material for: Novel Insights into Regulation of Human Teeth Biomineralization: Deciphering the Role of Post-Translational Modifications in a Tooth Protein Extract
Source: PubMed Central journal article supplement (PMC6720696; doi:10.3390/ijms20164035), 2019-08-19
Supplement: ijms-20-04035-s001.pdf [file ijms-20-04035-s001.pdf]

Supplementary Materials: Supplementary materials can be found at [www.mdpi.com/xxx/s1](http://www.mdpi.com/xxx/s1).

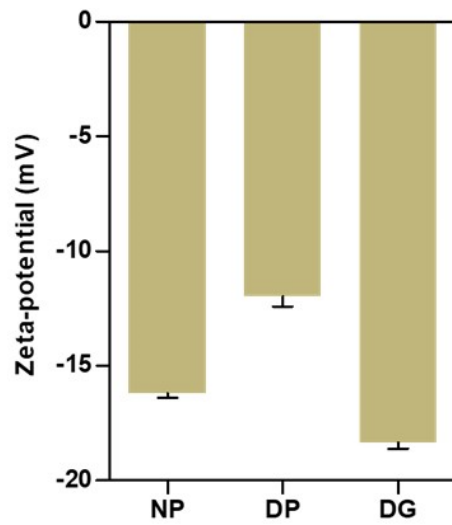

**Figure S1.** Zeta potential measurements of normal tooth protein (NP), dephosphorylated protein (DP) and deglycosylated protein (DG). The data represent the mean  $\pm$  standard error of three repeats.

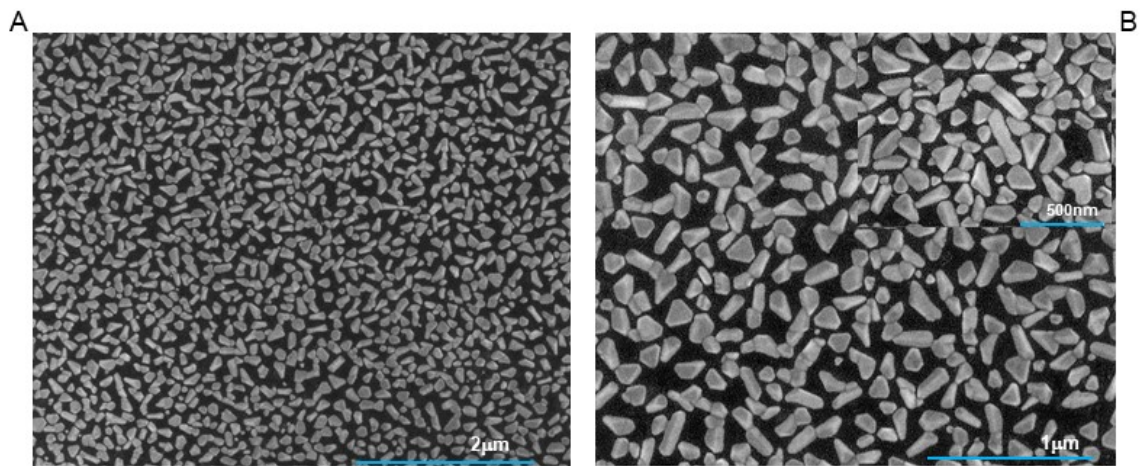

**Figure 2.** FESEM micrographs of protein only control studies (absence of calcium phosphate). **A** shows protein molecules at 2  $\mu$ m scale. **B** shows the enlarged version at 1  $\mu$ m. The inset in **B** shows the details at 500 nm.
